# Supplementary material for: Occurrence of foamy macrophages during the innate response of zebrafish to trypanosome infections
Source: eLife. 2021 Jun 11;10:e64520. doi: 10.7554/eLife.64520 (PMC8238505; doi:10.7554/eLife.64520)
Supplement: Figure 1—source data 1. [file elife-64520-fig1-data1.xlsx]

## Sheet: Figure 2A
figure 1A	(1) indicate individuals that were removed from the experiment at the indicated time point; (0) indicate fish remaining in each group
days post infection	PVP	Tcar infected
1
2
3		1
3		1
3		1
4		1
4		1
4		1
4		1
4		1
4		1
5	1	1
5	1	1
5	1	1
5		1
5		1
5		1
5		1
5		1
5		1
5		1
5		1
5		1
5		1
5		1
5		1
5		1
5		1
5		1
5		1
5		1
5		1
5		1
5		1
5		1
5		1
5		1
6		1
6		1
6		1
6		1
6		1
6		1
6		1
6		1
6		1
6		1
6		1
6		1
6		1
6		1
6		1
6		1
6		1
7	1	1
7	1	1
7	1	1
7	1	1
7	1	1
7	1	1
7		1
8	1	1
8		1
8		1
8		1
8		1
9	1
9	1
9	1
10	1	1
10	1	1
10	1
11
13
14
15	0	0
15	0	0
15	0	0
15	0	0
15	0	0
15	0	0
15	0	0
15	0	0
15	0	0
15	0
15	0
15	0
15	0
15	0
15	0
15	0
15	0
15	0
15	0
15	0
15	0
15	0
15	0
15	0
15	0
15	0
15	0
15	0
15	0

## Sheet: Figure 2B
	Figure 1B
	relative forld change	number of pools
	days post infection	1	2	3
	1	0.755165	1.01356	0.828394
	4	28.7064	52.6756	43.0613
	6	119.545	269.641	220.472
	8	117.186	190.848	156.078
	11	39.7663	57.8546	47.3234
