# Supplementary material for: Occurrence of foamy macrophages during the innate response of zebrafish to trypanosome infections
Source: eLife. 2021 Jun 11;10:e64520. doi: 10.7554/eLife.64520 (PMC8238505; doi:10.7554/eLife.64520)
Supplement: Figure 2—figure supplement 1—source data 1. [file elife-64520-fig2-figsupp1-data1.xlsx]

## Sheet: Figure 2 suppl. gene expr
	Relative fold change
	il1b	T. car low			T. car high				il6	T. car low			T. car high
	2	0.761188	1.66482	1.67397	0.761188	1.66482	1.67397		2	0.47176	0.769571	2.88635	0.47176	0.769571	2.88635
	4	1.45237	2.60043	2.61225	5.20761	1.92719	1.87547		4	6.56907	1.48653	6.20664	8.63159	5.30549	8.58552
	6	2.90074	1.80402	1.77879	3.5036	4.23175	11.9284		6	0.745227	1.69668	1.69668	3.6628	0.569689	2.10264
	10	0.42727	0.432341	0.691687	2.58939				10	3.15089	2.24156	1.7029
	16	1.76554	1.66564						16	5.488	3.74515
	tnfa	T. car low			T. car high				il10	T. car low			T. car high
	2	0.821827	0.65804	1.3614	0.821827	0.65804	1.3614		2	0.953496	0.815131	1.00584	0.953496	0.815131	1.00584
	4	1.22853	1.50022	0.814441	1.1579	1.2774	0.83386		4	2.44786	0.949731	2.57719	2.20589	1.5875	3.33756
	6	2.26837	0.857596	1.48513	2.707	1.74786	2.08638		6	3.71914	5.14916	2.45876	5.98749	2.72771	11.131
	10	3.86108	1.86832	2.98407	2.32962				10	0.504809	0.386077	0.763653	1.23656
	16	1.54352	1.73144						16	2.8381	2.18177
	tnfb	T. car low			T. car high
	2	0.657563	0.44927	1.06447	0.657563	0.44927	1.06447
	4	0.752788	1.86638	0.977067	1.51785	1.592	1.36663
	6	0.908341	1.35302	2.43842	4.88239	3.36318	4.0575
	10	2.2072	1.59572	2.47741	4.96195
	16	1.92734	0.811191
