# Supplementary material for: Occurrence of foamy macrophages during the innate response of zebrafish to trypanosome infections
Source: eLife. 2021 Jun 11;10:e64520. doi: 10.7554/eLife.64520 (PMC8238505; doi:10.7554/eLife.64520)
Supplement: Figure 2—source data 1. [file elife-64520-fig2-data1.xlsx]

## Sheet: Fig 2F clin score
	groups	t car low	t car low	t car high	t car high
	clinical score	1-3	4-5	4-5	6-10	total
	number of individuals	266	6	11	67	350
	%	76	1.71429	3.14286	19.1429	100

## Sheet: Fig 2G-survival
Figure 3G 2A	(1) indicate individuals that were removed from the experiment at the indicated time point; (0) indicate fish remaining in each group
days post infection	PVP	T. car low	T. car high
4
5			1
6
7		1	1
7		1	1
7		1	1
7			1
7			1
7			1
7			1
7			1
7			1
7			1
8	1	1	1
8		1	1
8		1
8		1
8		1
8		1
8		1
8		1
8		1
8		1
9	1	1	1
9	1	1	1
9	1	1	1
9	1		1
9	1		1
9			1
9			1
9			1
9			1
10	1	1	1
10	1	1	1
10	1		1
10			1
10			1
10			1
10			1
10			1
10			1
10			1
11	1		1
11	1		1
11			1
11			1
11			1
11			1
11			1
11			1
11			1
11			1
11			1
11			1
11			1
12			1
12			1
12			1
12			1
12			1
13
14	0	0
14	0	0
14	0	0
14	0	0
14	0	0
14	0	0
14	0	0
14	0	0
14	0	0
14	0	0
14	0	0
14	0	0
14	0	0
14	0	0
14	0	0
14	0	0
14	0	0
14	0	0
14	0	0
14	0	0
14	0	0
14	0	0
14	0	0
14	0	0
14	0	0
14	0	0
14	0	0
14	0	0
14	0	0
14	0	0
14	0	0
14	0	0
14	0
14	0
14	0
14	0
14	0
14	0
14	0

## Sheet: Fig 2H gene expression
		pools of larvae					pools of larvae
	T. car low	1	2	3		T. car high	1	2	3
	2	3.6399	6.86039	15.9862		2
	4	4.13607	8.78955	3.33509		4	31.9986	30.3685	37.6375
	6	12.8612	16.0233	8.96234		6	95.0738	85.8188	116.051
	10	0.93812	0.477384	0.427114		10	30.1998
	16	6.42841	1.0945			16
