# Supplementary material for: Occurrence of foamy macrophages during the innate response of zebrafish to trypanosome infections
Source: eLife. 2021 Jun 11;10:e64520. doi: 10.7554/eLife.64520 (PMC8238505; doi:10.7554/eLife.64520)
Supplement: Figure 3—source data 1. [file elife-64520-fig3-data1.xlsx]

## Sheet: Figure 3C neutrophils
	Figure 4C neutrophils
dpi	PVP
3	40.9212	91.4264	32.8395	44.4682	30.9855	22.4245	42.1802	40.2824	37.9008	65.9511	66.6897	72.561	29.1397	15.7018	44.1683	71.5978	51.604	21.4486
5	36.196	54.4498	46.0821	28.1849	31.4233	35.7314	94.1197	50.8963	34.5436	67.3835	86.3746	56.2334	29.3014	28.2574	35.4447	81.6235	75.9044	46.9482	9.11652	18.0521	2.5401	27.1152	16.8368	27.4873	16.4308	19.4589	16.7311	22.8422	27.7086	22.8918	22.2968	15.8254	19.005	24.8502	38.121	16.6895	79.275	55.0303	31.8413	66.7114	57.3153	85.3382	18.2701	8.21283	14.3215
7	78.4455	24.0347	35.7224	80.2999	11.7971	33.1346	80.5364	31.7215	33.8642	86.5654	32.5249	59.6048	37.2486	22.8695	49.7266	36.2785	17.0082	33.655	18.4459	24.2511	36.1544	17.0864	7.8423	6.68337	44.6105	34.3978	15.827	58.6839	48.3581	79.2253	44.0759	9.24046	19.8127	54.7215	19.0472
9	67.7319	30.7437	57.3265	175.407	60.2998	51.691	41.3502	97.9695	40.057	49.115	54.3379	118.548	21.87	30.5802	27.2226	28.8205	40.6595	44.4639	70.3439	176.242	158.963	15.0736	29.7934	74.6093
dpi	T. car infected at 3 dpi, and T. car low at 5, 7, 9 dpi
3	105.93	44.1512	52.1278	50.6462	69.4216	53.501	48.1984	53.1228	44.1291	106.71	100.716	32.0605	52.4786	75.6217	66.2898	82.168	74.939	70.469
5	64.2439	60.9994	37.7285	46.5327	67.4512	40.6212	55.7301	41.1524	26.0734	47.8568	51.9579	28.3793	56.375	30.2272	40.1634	92.5412	89.999	28.8585	47.5088	31.6172	52.4551	18.8258	8.82013	18.407	30.1055	31.4721	11.9649	22.2052	13.4596	16.8058	19.6947	-1.44818	15.8652	63.9618	63.5078	26.84	36.1906	33.7256	56.0238	61.415	35.0321	56.1484	47.6962	48.0956
7	40.8601	127.329	44.3899	71.7701	55.6744	40.8451	26.9446	63.5943	83.3541	77.8694	84.317	82.0291	54.7748	33.5716	70.2802	61.3697	7.83247	19.7109	-2.01916	2.94667	18.4704	36.2343	57.6752	69.5564	35.8363	24.5553	59.39	39.4833	90.0647	32.8178	31.7766	79.0118	48.377	68.191
9	100.959	108.254	99.3484	77.1868	50.2595	56.6365	42.3859	60.8878	69.9476	168.483	125.41	49.6775	18.0517	24.2543	36.609	40.5525	64.9966	78.3939	56.3886	59.2268	85.3547	48.0822	25.2246	85.0702	69.2695	44.5939	33.6444
dpi	T. car-high infected
3
5	71.2922	12.503	21.7373	15.1756	19.4821	58.1257	14.0699	18.9808	7.53949	19.0186	15.1477	50.82	23.5106	15.1529	16.2085	19.2754
7	42.0595	48.5306	50.2332	1.66974	9.16748	12.8326	5.78065	15.6677	22.5904	40
9	50.3462	41.702	101.814	69.5753	71.5832
	each number represents the Crrected Total Cell Fluorescence (CTCF) of an individual fish within the indicated group at the indicated time point.
	Individuals were separated in T. car-low and -high at 4 dpi.
	For semplicity the CTCF values of T. car-infected at 3 dpi are listed in the second panes together with CTCF values of T. car-low at 5, 7, 9 dpi

## Sheet: Figure 3C macrophages
	Figure 4C macrophages
dpi	PVP
3	16.9989	32.5913	11.5275	25.6254	13.016	12.0764	23.7253	13.8496	16.9703	34.3424	21.3106	17.019	23.328	17.2375	29.9113	27.7524	24.9861	10.138
5	46.4565	68.2185	33.7843	81.0968	27.7921	63.6467	29.1018	37.7936	17.4105	45.5837	66.7268	29.1643	23.5933	10.8246	37.143	47.4673	34.5712	62.9493	24.5135	18.2026	35.8037	45.7522	29.7725	21.495	20.196	16.5239	35.6783	53.1356	17.4637	15.2943	20.3966	17.0919	20.4095	40.1154	22.5224	17.073	24.524	19.7587	27.3852	1.47425	18.1192	30.1142	21.8033	15.2057	22.2983	39.1748	13.41
7	70.3981	56.9617	128.59	46.9035	27.8612	31.8362	30.0829	32.8289	93.2011	60.6767	13.2666	46.0781	27.4729	26.2585	44.5344	20.8571	19.7781	69.8151	13.9919	42.3986	25.4514	28.7234	10.3542	14.8429	14.2477	23.3369	22.5996	15.1707	-6.06079	28.8323	17.5888	11.7465	5.06311	24.03	22.9159
9	80.1748	181.599	124.058	34.1192	22.5063	53.1268	53.5368	54.9546	60.8591	47.3991	12.8224	8.36496	44.8697	72.9146	7.08124	49.8481	13.2529	37.3936	-8.40279	11.9924	15.0008	16.716	11.5665	20.1914
dpi	T. car infected at 3 dpi, and T. car low at 5, 7, 9 dpi
3	52.3574	33.1642	34.8887	28.3052	47.7112	73.8321	67.4517	53.1978	96.0036	53.6193	30.2098	19.3248	56.7234	58.2401	37.3317	58.747	69.634	135.539
5	61.1688	161.962	174.135	85.3344	106.43	177.439	74.3042	99.5112	141.449	115.468	167.428	91.319	163.446	106.599	132.248	48.5114	56.7751	23.8437	82.4281	56.3064	9.21984	95.0863	21.6865	20.935	115.373	60.4521	60.0096	82.2201	36.332	59.2814	25.2561	90.0094	298.523	89.4638	46.4493	-0.32789	28.2672	76.9194	75.9367	25.0151	62.7882	68.3928	27.0303	18.3891
7	157.372	135.711	135.253	59.0195	181.298	130.609	273.943	194.195	88.4716	91.7881	77.4472	93.1137	210.8	265.96	120.67	39.1249	182.87	175.229	57.1529	78.6283	86.2782	44.3828	38.4145	43.7442	93.8107	74.3314	126.102	177.783	179.278	39.8129	211.189	77.5885	91.8507	123.97	-2.53958	20.5941	32.6557	28.0528	89.0464
9	348.724	146.026	167.669	361.348	185.126	103.188	87.3527	172.406	99.6371	74.1959	83.5923	106.394	226.795	133.65	95.344	159.175	25.6964	129.75	192.577	177.168	46.3542	123.748	52.0768	281.077	100.753	73.1102	62.9789	46.233	-10.8525	6.04438
dpi	T. car-high infected
3
5	35.7197	126.962	91.525	48.9055	19.2465	15.1396	29.595	43.585	32.5823	63.0099	38.541	147.302	19.1423	30.5777	45.5717	32.5735
7	106.859	140.002	30.7007	102.017	25.8595	29.2784	17.0533	31.1015	61.5708	26.4957
9	168.369	317.66	216.145	149.461	-1.20614
	each number represents the Crrected Total Cell Fluorescence (CTCF) of an individual fish within the indicated group at the indicated time point.
	Individuals were separated in T. car-low and -high at 4 dpi.
	For semplicity the CTCF values of T. car-infected at 3 dpi are listed in the second panes together with CTCF values of T. car-low at 5, 7, 9 dpi
