# Supplementary material for: Occurrence of foamy macrophages during the innate response of zebrafish to trypanosome infections
Source: eLife. 2021 Jun 11;10:e64520. doi: 10.7554/eLife.64520 (PMC8238505; doi:10.7554/eLife.64520)
Supplement: Figure 4—source data 1. [file elife-64520-fig4-data1.xlsx]

## Sheet: Figure 4 macrophages EdU
	Fisgure 4B
	CTCF	total macrophages - head
	PVP	1950000000	2420000000	1730000000	923447400
	T. car low	3330000000	3070000000	2690000000	3223738000
	T. car high	2559637000	1962458000	2165618000	3025736000
	Fisgure 4C
	CTCF	total macrophages - trunk
	PVP	545000000	320000000	485000000	441000000	534000000
	T. car low	1154143000	1997866000	1091325000	1091325000	766163200
	T. car high	1479412000	1536013000	1150686000	1377284000	961032800
	Figure 4D
	number of EdU+ macrophages - trunk
	PVP	T. car low	T. car high
	2	6	11
	1	8	10
	0	7	6
	4	7	9
	1	16	18
