# Supplementary material for: Occurrence of foamy macrophages during the innate response of zebrafish to trypanosome infections
Source: eLife. 2021 Jun 11;10:e64520. doi: 10.7554/eLife.64520 (PMC8238505; doi:10.7554/eLife.64520)
Supplement: Figure 5—source data 1. [file elife-64520-fig5-data1.xlsx]

## Sheet: Figure 5 neutrophils EdU
	Figure 5B
	Neutrophils
	CTCF	total neutrophils - head
	PVP	1402874000	3079489000	1883045000	2509054000
	T. car low	3447416000	3224684000	2642420000	2156603000
	T. car high	3124277000	1733486000	3523910000	2450398000
	Figure 5C
	CTCF	total neutrophils - trunk
	PVP	371000000	751000000	256000000	435000000	592000000
	T. car low	959000000	185000000	440000000	355000000	672000000
	T. car high	939000000	492000000	286000000	331000000	1250000000
	Figure 5D
	number of EdU+ neutrophils - trunk
	PVP	T. car low	T. car high
	1	5	3
	0	2	3
	1	2	3
	0	2	3
	0	4	4
