# Supplementary material for: Occurrence of foamy macrophages during the innate response of zebrafish to trypanosome infections
Source: eLife. 2021 Jun 11;10:e64520. doi: 10.7554/eLife.64520 (PMC8238505; doi:10.7554/eLife.64520)
Supplement: Figure 6—source data 1. [file elife-64520-fig6-data1.xlsx]

## Sheet: Figure 6
		number of neutrophils
	Figure 6B	inside					outside
	PVP	0	0	0	0		6	4	4	9
	T. car low	0	0	0	0	0	7	9	6	9	15
	T. car high	0	0	0	0	0	9	5	11	5	14
		macrophage number
	Figure 6C-left panel	inside						outside
	PVP	0	0	0	0	0		16	3	6	10	7
	T. car low	3	1	3	0	0	0	11	10	10	6	10	9
	T. car high	7	1	4	6	4		11	1	25	16	9
		macrophage number
	Figure 6C-right panel	inside non-round						inside round
	PVP	0	0	0	0	0		0	0	0	0	0
	T. car low	3	1	3	0	0	0	0	0	0	0	0	0
	T. car high	2	0	0	2	0		5	1	4	4	4
