# Supplementary material for: Occurrence of foamy macrophages during the innate response of zebrafish to trypanosome infections
Source: eLife. 2021 Jun 11;10:e64520. doi: 10.7554/eLife.64520 (PMC8238505; doi:10.7554/eLife.64520)
Supplement: Figure 7—source data 1. [file elife-64520-fig7-data1.xlsx]

## Sheet: Figure 7
		number of macrophages
	Figure 7C	BODIPY+					BODIPY-
	PVP	0	0	0	0	0	4	5	5	3	7
	T. car low	0	0	0	0		8	10	8	6
	T. car high	11	6	7	4	6	17	3	8	2	2
