# Supplementary material for: Occurrence of foamy macrophages during the innate response of zebrafish to trypanosome infections
Source: eLife. 2021 Jun 11;10:e64520. doi: 10.7554/eLife.64520 (PMC8238505; doi:10.7554/eLife.64520)
Supplement: Figure 9—source data 1. [file elife-64520-fig9-data1.xlsx]

## Sheet: Figure 9C
	Figure 9C
		number of foamy macrophages
		il1B -								il1B +
	PVP	0	0	0	0	0	0	0	0	0	0	0	0	0	0	0	0
	T. car low	0	0	0	0	0	0	0	0	0	0	0	0	0	0	0	0
	T. car high	0	0	0	0	0	0	0		1	2	2	2	2	1	2
		number of non-foamy macrophages
		il1B -								il1B +
	PVP	4	2	1	2	4	5	6	1	0	3	4	2	1	2	2	4
	T. car low	2	3	6	6	3	6	1	7	2	0	1	3	3	1	3	1
	T. car high	13	4	5	3	11	3	2		4	6	0	2	12	4	3
		number of foamy macrophages
		tnfa -								tnfa +
	PVP	0	0	0	0	0	0	0	0	0	0	0	0	0	0	0	0
	T. car low	0	0	0	0	0	0	0		0	0	0	0	0	0	0
	T. car high	0	0	0	0	0	0	0	0	2	6	1	3	2	4	5	3
		number of non-foamy macrophages
		tnfa -								tnfa +
	PVP	6	4	4	2	6	4	3	4	0	0	2	1	1	2	3	1
	T. car low	4	8	2	2	4	2	2		7	0	4	6	5	2	4
	T. car high	5	5	8	1	8	3	5	6	5	3	15	10	6	6	5	7
